# Supplementary material
Source: publisher figshare collection journal article supplement (https://sage.figshare.com/ndownloader/files/13378241)
Supplement: Supplementary file 1 [file 13378241]

## Sheet: Sheet1
	Supplementary Table S3: Full description of targeted amplicon sequencing data for OSCC tissues
	Patient No.	Sample type	Mapped reads	Reads on target (%)	Coverage depth	Uniformity (%)	1x Coverage (%)	20x Coverage (%)	100x Coverage (%)	500x Coverage (%)
	1	Frozen	366724	97.75	1714	98.31	100	100	100	97.24
	2	Frozen	373498	79.49	1326	98.31	100	100	99.61	94.47
	3	FFPE	299297	79.23	723.2	84.71	98.92	93.38	62.83	28.76
	4	FFPE	250764	96.48	1049	98.42	100	100	100	91.68
	5	Frozen	299132	98.36	1413	96.72	100	100	98.86	94.76
	6	FFPE	184805	92.87	743.6	97.56	100	100	97.58	64.68
	7	Frozen	221654	94.93	983.9	99.01	100	100	100	93.1
	8	Frozen	311536	94.97	1548.4	93.75	100	100	99	96
	9	FFPE	140493	81.72	339.3	84.8	100	80.49	50.96	18.96
	10	Frozen	368630	97.01	1687.2	96.25	100	100	100	96
	11	Frozen	248647	97.15	1128	98.3	100	100	99.61	92.05
	12	Frozen	209593	96.3	952.5	98.24	100	100	98.83	89.87
	13	Frozen	353412	88.8	1501	98.31	100	100	100	96.36
	14	Frozen	310640	94.79	1863	93.8	100	100	100	90.9
	15	Frozen	317887	97.01	1285.2	92.05	100	100	99.5	93
	16	FFPE	688528	95.15	2575	90.87	100	98.92	95.09	63.54
	17	Frozen	287558	94.1	1090	94.45	100	100	99.1	93.9
	18	Frozen	305784	97.2	1304.6	98.78	100	100	99.1	95
	19	Frozen	260772	96.38	1024.8	95.52	100	100	99.4	96.1
	20	FFPE	317509	91.11	1294	75.13	100	98.53	90.92	58.49
	21	FFPE	393829	97.57	1645	82.61	100	99.88	96.8	71.04
	22	FFPE	154056	96.07	676.4	96	100	100	97.05	72.88
	23	Frozen	203927	97.98	934.8	97.73	100	100	99.77	84.51
	24	FFPE	170595	94.54	676.7	97.93	100	100	98.53	53.9
	25	FFPE	254420	96.1	1035	96.58	100	100	98.53	73.95
	26	Frozen	363236	97	1789.2	94.26	100	100	99.1	95.2
	27	Frozen	349319	97.98	1630	99.38	100	100	100	97.38
	28	Frozen	397241	96.1	1724.7	96.11	100	100	99.5	97.7
	29	FFPE	200635	96.38	893.5	95	100	99.61	97.35	76.64
	30	Frozen	353513	98.18	1661	98.31	100	100	99.61	96.18
	31	Frozen	347076	96.09	1845.6	97	100	100	100	93.3
	32	Frozen	352020	96.85	1359.6	93.96	100	100	98.7	94.3
	33	Frozen	409085	95.78	2026	94.11	100	100	100	94.3
	34	FFPE	243675	83.06	763.8	77.41	100	98.53	81.1	34.09
	35	Frozen	341322	95.41	1561	97.17	100	100	99.61	95.93
	36	Frozen	332136	97	1889.6	94.35	100	100	100	97.1
	37	Frozen	398621	98.01	1864	99.12	100	100	100	97.88
	38	FFPE	155870	92.99	630.1	78.57	100	98.01	84.78	37.35
	39	FFPE	103635	83.22	368.6	96.33	100	100	90.94	20.97
	40	Frozen	355053	93.01	1931	96.82	100	100	99.2	97.7
	41	FFPE	413923	85.41	1383	95.17	100	100	100	85.99
	42	Frozen	341245	98.11	1608	96.31	100	100	99.38	95.29
	43	Frozen	266740	94.1	1100.8	91.16	100	100	98.7	90
	44	FFPE	196735	93.26	780.7	77.41	100	99.65	98.07	50.57
	45	FFPE	146952	81.1	334.4	79.33	100	97.22	59.46	19.29
	46	FFPE	64629	95	260.4	93.19	100	98.53	81.86	14.33
	47	FFPE	67556	94.84	269.3	90.83	100	98.1	78.16	11.54
	48	Frozen	245286	96.85	1082.4	97.32	100	100	99.6	88.5
	49	FFPE	201207	98.51	887.2	92.35	100	100	95.83	65.1
	50	Frozen	373955	97.38	1745	97.56	100	100	99.38	95.89
	51	FFPE	143915	82.08	490.7	97.93	100	100	97.85	33.35
	52	Frozen	330991	95.2223	1743.2	94.63	100	100	100	95
	53	FFPE	122008	79.76	336.1	95.36	100	99.43	89.06	20.91
	54	Frozen	359892	96.0112	1744.2	96.1	100	100	99.2	95.2
	55	FFPE	84026	92.96	317.1	79.2	99.45	89.62	57.32	19.09
	56	FFPE	204421	92.47	838.3	87.21	100	99.45	95.4	57.03
	57	FFPE	180253	92.21	669.2	80.57	100	98.01	86.9	36.17
	58	FFPE	452688	93.36	1695	81.63	100	99.47	97.51	68.87
	59	FFPE	218593	93.23	870.2	92.03	100	100	98.53	66.92
	60	FFPE	101794	90.27	304.8	78.23	100	86.58	50.84	19.63
	61	FFPE	151549	79.71	501	97.17	100	100	97.52	34.36
	62	FFPE	550092	85.52	2053	93.49	100	100	100	98.06
	63	FFPE	363715	89.4	1410	95.1	100	100	100	92.08
	64	FFPE	496453	75.5	1442	86.97	100	100	98.49	68.59
	65	Frozen	468760	94.51	2024	94.98	100	100	98.84	92.97
	66	FFPE	188864	94.73	771	94.54	100	100	96.66	57.72
	67	Frozen	340179	96.45	1262.8	96.79	100	100	98.9	92.1
	68	Frozen	218415	96.2	1047.6	95.64	100	100	99.4	89
	69	FFPE	425550	95.96	1842	94.1	100	100	98.53	94.94
	70	FFPE	280636	96.77	1218	97.78	100	100	99.61	95.53
	71	FFPE	191605	91.42	734.3	92.58	100	100	98.15	61.87
	72	Frozen	480634	95.3	2191	96.62	100	100	99.61	96.62
	73	Frozen	296263	95.23	1213.2	95.46	100	100	99.1	90.5
	74	Frozen	183888	94.23	817.2	98.31	100	100	98.86	84.28
	75	Frozen	434418	97.85	2038	98.31	100	100	99.75	97.17
	76	Frozen	281095	96	1128.8	95.65	100	100	98.6	92
	77	Frozen	376398	96.45	1656	97.32	100	100	99.1	95.5
	78	Frozen	279778	98.51	1282	97.73	100	100	100	92.91
	79	FFPE	262983	94.74	1161	89.58	100	98.92	97.19	72.81
	80	FFPE	377835	98.18	1601	84.28	100	99.45	97.45	71.02
